# Supplementary material
Source: PubMed Central journal article supplement (PMC3584201)
Supplement: NIHMS430106-supplement-109_2012_982_MOESM1_ESM.pdf [file NIHMS430106-supplement-109_2012_982_MOESM1_ESM.pdf]

## Supplemental Material

# FOXO1-mediated Upregulation of Pyruvate Dehydrogenase Kinase-4 (PDK4) Decreases Glucose Oxidation and Impairs Right Ventricular Function in Pulmonary Hypertension: *Therapeutic Benefits of Dichloroacetate*

Lin Piao<sup>1</sup>, Vaninder K. Sidhu<sup>2</sup>, Yong-Hu Fang<sup>1</sup>, John J. Ryan<sup>1</sup>, Kishan S. Parikh<sup>1</sup>, Zhigang Hong<sup>1</sup>, Peter T. Toth<sup>1</sup>, Erik Morrow<sup>1</sup>, Shelby Kutty<sup>3</sup>, Gary D. Lopaschuk<sup>2</sup>, Stephen L. Archer<sup>1</sup>

Journal of Molecular Medicine 2012

---

### Methods

**Echocardiography** Echocardiography was performed on lightly anesthetized, spontaneously breathing rats (isoflurane 2.0%) using the Vevo 2100 System for animal models (VisualSonics Inc, Ontario, Canada). Pulmonary artery acceleration time (PAAT), RV free wall thickness (RVFW), cardiac output (CO) and stroke volume (SV) Doppler, and 2D and M-mode echo were measured as previously described[1]. For quantification of CO, maximal diameter of pulmonary artery (PAD) and velocity time integral (VTI<sub>PA</sub>) of pulsed wave Doppler were obtained. CO was then calculated as:  $3.14 \times (PAD/2)^2 \times VTI_{PA} \times \text{heart rate}$ . Tricuspid annular plane systolic excursion (TAPSE) was measured as a marker of right ventricle function. TAPSE of the tricuspid annular plane was measured using M-mode through the lateral portion of the tricuspid annular plane in the apical four-chamber view[2].

**Cardiac output and Catherization** Cardiac output and RV systolic pressure (RVSP) in rats was measured using the thermodilution method in closed-chest, anesthetized rats, as described previously[3]. Briefly, after anesthesia and intubation, the right carotid artery and jugular vein was exposed. After the distal part of the carotid artery was ligated, a thermistor probe catheter (Physitemp Instruments, Inc., Clifton, NJ) was gently inserted into the aorta via the carotid artery and a 22-gauge catheter was gently introduced into the jugular vein via a cut-down technique. A bolus of iced saline (0.3ml) was injected and a thermodilution curve (temperature vs. time) was recorded. PowerLab data acquisition system (AD Instruments, Colorado Springs, CO) was used to record temperature change

and CO was then determined by calculating the area under the temperature curve. Subsequently the chest was opened for direct RV puncture and catheterization of the pulmonary artery (PA).

**Energy Metabolism Measurements in Isolated Working Hearts** Cardiac output (mL/min) was expressed in terms of  $\text{m}^3/\text{s}$  as  $1\text{mL} = 1 \cdot 10^{-6} \text{m}^3$  and  $1\text{min} = 60\text{s}$ ; developed pressure (mmHg) was expressed in Pa as  $1\text{mmHg} = 133.322 \text{Pa} = 133.322 \text{kg}/(\text{m} \cdot \text{s}^2)$ . Cardiac work was calculated as the product of cardiac output and LV developed pressure (peak systolic pressure – preload pressure): [volume displaced in 1 min (in  $\text{m}^3$ )] • [pressure (in Pa)]. Cardiac output (mL/min) was expressed as  $\text{m}^3$  as  $1\text{mL} = 1 \cdot 10^{-6} \text{m}^3$ ; developed pressure (mmHg) was expressed in Pa as  $1\text{mmHg} = 133.322 \text{Pa} = 133.322 \text{kg}/(\text{m} \cdot \text{s}^2)$ . The final product was presented in units of Joules/min ( $\text{J} = \text{m}^2 \cdot \text{kg}/\text{s}^2$ ).

**Catheterization** A Millar pressure catheter (Millar Instruments, Inc, Houston, TX) was inserted, as described previously[3]. Catheterization was performed in ventilated, open-chest rats by inserting a catheter into the RV via an apical puncture with a 26-gauge needle. RVSP was recorded and analyzed by using PowerLab data acquisition system.

**RV Myocytes Isolation** Briefly, after the heart was isolated and cannulated, it was perfused with  $\text{Ca}^{2+}$ -free solution for 6 minutes. Next, the heart was perfused with 25 ml perfusion buffer containing 25 mg collagenase, 7 mg hyaluronidase and 1 mg trypsin inhibitor (Worthington, Lakewood, NJ) for 30 minutes at  $37^\circ\text{C}$ . The RV was then minced and the myocytes were isolated by trituration in a glass pipette.

**Quantitative RT-PCR** Tissue-total RNA was extracted from RV tissues from FHR and FHR+Dichloroacetate groups using the PureLink Micro-to-Midi Total RNA Isolation Kit (Invitrogen, Carlsbad, CA). mRNA levels of PDH- $\beta$  and PDK4 were measured using the ABI PRISM 7900HT PCR system (Applied Biosystems, Foster City, CA) and normalized to  $\beta 2$  microglobulin mRNA expression. The cycle threshold value (Ct) for each gene was obtained using SDS RQ manager 1.2 (Applied Biosystems, Foster City, CA).

**PDH activity** The measurement of PDH activity was performed as previously described[4]. Briefly, immunocapturing of PDH was performed with anti-PDH antibody immobilized on a dipstick by following the manufacturer's instructions (Abcam, Cambridge, MA). The colored precipitate was quantified using Image J software (NIH, Bethesda, MD).

**Immunostaining** After the fixation, frozen sections of RV were incubated with primary antibodies for 1 hour and secondary antibodies for 30 minutes. The antifade reagent (Prolong Gold; Invitrogen, Life Technologies, Grand Island, NY) contained 4',6-

diamidino-2-phenylindole (DAPI) to stain the nuclei of the cells. Images were acquired with the Zeiss LSM 510 META confocal microscope (Carl Zeiss Inc, Thornwood, NY) using 488 nm and 561 nm lasers. DAPI was visualized with the Chameleon Ultra 2 photon laser (Coherent Inc, Santa Clara, CA) at 770 nm. Immunofluorescence intensities were calculated with ImageJ after background subtraction.

**Western blotting** The protein expression levels of PDK4 and forkhead box protein O1 (FOXO1), a putative regulator of PDK4 expression, were assessed by immunoblot on 20µg of RV protein as described previously[1]. The primary antibodies used were anti-PDK1-4, anti-FOXO1 (Abcam, Cambridge, MA) and anti-actin (Millipore, Billerica, MA). The secondary antibodies were anti-rabbit IgG and anti-mouse IgG antibodies (Cell Signaling Technology, Boston, MA).

### Supplemental Tables:

**Supplemental Table 1. Rat glucose metabolism PCR Array profile\***

| Genes | Description                                            | FHR                     |                  | FHR+DCA                 |                  |
|-------|--------------------------------------------------------|-------------------------|------------------|-------------------------|------------------|
|       |                                                        | Fold regulation vs. CTR | P values vs. CTR | Fold regulation vs. FHR | P values vs. FHR |
| Pdk4  | Pyruvate dehydrogenase kinase, isozyme 4               | 6.24                    | 0.0031           | -4.18                   | 0.0208           |
| Aldob | Aldolase B, fructose-bisphosphate                      | 4.47                    | 0.0005           | -1.68                   | 0.0585           |
| Pgls  | 6-phosphogluconolactonase                              | -17.73                  | 0                | -1.83                   | 0.0267           |
| Tpi1  | Triosephosphate isomerase 1                            | -47.22                  | 0.00001          | -1.18                   | 0.5141           |
| Hk2   | Hexokinase 2                                           | -4.17                   | 0.0002           | -1.07                   | 0.8297           |
| Pgm3  | Phosphoglucomutase 3                                   | -2.67                   | 0.0072           | 1.95                    | 0.1475           |
| Tkt   | Transketolase                                          | -2.67                   | 0.0014           | 1.42                    | 0.1573           |
| Pgm2  | Phosphoglucomutase 2                                   | -2.6                    | 0.0007           | 1.15                    | 0.6873           |
| Pygl  | Phosphorylase, glycogen, liver                         | -2.46                   | 0.0013           | 1.2                     | 0.6609           |
| Pdp2  | Pyruvate dehydrogenase phosphatase catalytic subunit 2 | -2.37                   | 0.0002           | 1.42                    | 0.1181           |
| Rbks  | Ribokinase                                             | -2.12                   | 0.0046           | 1.3                     | 0.4675           |
| Phkg2 | Phosphorylase kinase, gamma 2 (testis)                 | -2.08                   | 0.0038           | 1.15                    | 0.4769           |
| Pck2  | Phosphoenolpyruvate carboxykinase 2 (mitochondrial)    | -2.04                   | 0.0018           | 1.23                    | 0.1987           |

|        |                                                                                  |       |        |        |        |
|--------|----------------------------------------------------------------------------------|-------|--------|--------|--------|
| H6pd   | Hexose-6-phosphate dehydrogenase (glucose 1-dehydrogenase)                       | -2.03 | 0.0003 | -1     | 0.9602 |
| Fbp1   | Fructose-1,6-bisphosphatase 1                                                    | 1.71  | 0.0475 | -1.41  | 0.1702 |
| Sdha   | Succinate dehydrogenase complex, subunit A, flavoprotein (Fp)                    | 1.3   | 0.0492 | 1.06   | 0.7077 |
| Gsk3b  | Glycogen synthase kinase 3 beta                                                  | -1.92 | 0.0001 | 1.1    | 0.496  |
| Idh3g  | Isocitrate dehydrogenase 3 (NAD), gamma                                          | -1.88 | 0.0012 | -1.2   | 0.2261 |
| Pdk2   | Pyruvate dehydrogenase kinase, isozyme 2                                         | -1.86 | 0.0008 | 1.21   | 0.3388 |
| Gsk3a  | Glycogen synthase kinase 3 alpha                                                 | -1.83 | 0.0007 | 1.04   | 0.8893 |
| Bpgm   | 2,3-bisphosphoglycerate mutase                                                   | -1.83 | 0.001  | 1.06   | 0.7989 |
| Pdk1   | Pyruvate dehydrogenase kinase, isozyme 1                                         | -1.8  | 0.0155 | 1.1491 | 0.8241 |
| Pdk3   | Pyruvate dehydrogenase kinase, isozyme 3                                         | -1.78 | 0.003  | 1.54   | 0.0768 |
| Ogdhl  | Oxoglutarate dehydrogenase-like                                                  | -1.73 | 0.0013 | -1.78  | 0.0177 |
| Rpia   | Ribose 5-phosphate isomerase A                                                   | -1.7  | 0.0002 | -1.07  | 0.4764 |
| Acly   | ATP citrate lyase                                                                | -1.7  | 0.0173 | 1.1    | 0.7586 |
| Pc     | Pyruvate carboxylase                                                             | -1.63 | 0.0081 | 1.22   | 0.0652 |
| Pfkl   | Phosphofructokinase, liver                                                       | -1.63 | 0.029  | 1.45   | 0.2611 |
| Sucla2 | Succinate-CoA ligase, ADP-forming, beta subunit                                  | -1.66 | 0.0003 | 1.12   | 0.4128 |
| Suclg2 | Succinate-CoA ligase, GDP-forming, beta subunit                                  | -1.63 | 0.0023 | -1.04  | 0.736  |
| Dlst   | Dihydrolipoamide S-succinyltransferase (E2 component of 2-oxo-glutarate complex) | -1.61 | 0.0045 | -1.18  | 0.39   |
| G6pc3  | Glucose 6 phosphatase, catalytic3                                                | -1.58 | 0.0073 | -1.03  | 0.782  |
| Phkg1  | Phosphorylase kinase, gamma 1                                                    | -1.55 | 0.0151 | 1.41   | 0.0133 |
| Gapdh  | Glyceraldehyde-3-phosphate dehydrogenase                                         | -1.51 | 0.0121 | -1.08  | 0.7374 |
| Gck    | Glucokinase                                                                      | -1.51 | 0.0478 | -1.14  | 0.5542 |
| Pgm1   | Phosphoglucomutase 1                                                             | -1.48 | 0.0002 | -1.11  | 0.4721 |
| Gys1   | Glycogen synthase 1, muscle                                                      | -1.41 | 0.0034 | 1.1    | 0.4738 |
| Idh3a  | Isocitrate dehydrogenase 3 (NAD+) alpha                                          | -1.41 | 0.0023 | -1.01  | 0.8955 |

|      |                                                       |       |        |       |        |
|------|-------------------------------------------------------|-------|--------|-------|--------|
| Galm | Galactose mutarotase (aldose 1-epimerase)             | -1.36 | 0.0371 | 1.2   | 0.197  |
| Pgk1 | Phosphoglycerate kinase 1                             | -1.35 | 0.0318 | -1.02 | 0.8566 |
| Gpi  | Glucose phosphate isomerase                           | -1.31 | 0.029  | 1.04  | 0.8358 |
| Pdpr | Pyruvate dehydrogenase phosphatase regulatory subunit | -1.31 | 0.037  | 1.1   | 0.5499 |

The upregulation more than 2 is labeled in red and the downregulation less than -2 is labeled in dark green. P<0.05 is labeled in blue.

\*The expression of below 42 glucose metabolism-related genes were not significantly changed both in FHR and FHR+Dichloroacetate groups: aconitase 1, 2 (mitochondrial), amylo-1,6-glucosidase, 4-alpha-glucanotransferase, aldolase A, aldolase C, citrate synthase, dihydrolipoamide S-acetyltransferase, dihydrolipoamide dehydrogenase, enolase 1, 2, 3, fructose-1,6-bisphosphatase 2, fumarate hydratase 1, glucose-6-phosphatase (catalytic subunit), glucose-6-phosphate dehydrogenase, glyceraldehyde-3-phosphate dehydrogenase (spermatogenic), glucan (1,4-alpha-), glycogen synthase 2, hexokinase 3, isocitrate dehydrogenase 1 (NADP+), isocitrate dehydrogenase 2 (NADP+) (mitochondrial), isocitrate dehydrogenase 3 (NAD+) beta, malate dehydrogenase 1, malate dehydrogenase 1B, malate dehydrogenase 2, phosphoenolpyruvate carboxykinase 1 (soluble), pyruvate dehydrogenase (lipoamide) alpha 2, pyruvate dehydrogenase (lipoamide) beta, phosphoglycerate mutase 2 (muscle), phosphoglycerate kinase 2, phosphorylase kinase alpha 1, phosphorylase kinase beta, pyruvate kinase (liver and RBC), phosphoribosyl pyrophosphate synthetase 1, Phosphoribosyl pyrophosphate synthetase 1-like 1, phosphorylase, glycogen (muscle), succinate dehydrogenase complex subunit B iron sulfur (Ip), succinate dehydrogenase complex subunit C (integral membrane protein), succinate dehydrogenase complex subunit D (integral membrane protein), succinate-CoA ligase alpha subunit, transaldolase 1.

**Supplemental Table 2. Rat fatty acid metabolism PCR Array profile\***

| Genes  | Description                                                        | FHR                     |                  | FHR+DCA                 |                  |
|--------|--------------------------------------------------------------------|-------------------------|------------------|-------------------------|------------------|
|        |                                                                    | Fold regulation vs. CTR | P values vs. CTR | Fold regulation vs. FHR | P values vs. FHR |
| Acox2  | Acyl-Coenzyme A oxidase 2, branched chain                          | 61.20                   | 0.0000           | 1.12                    | 0.2373           |
| Acads  | Acyl-Coenzyme A dehydrogenase, C-2 to C-3 short chain              | -2.82                   | 0.0031           | 1.25                    | 0.6951           |
| Fabp1  | Fatty acid binding protein 1, liver                                | -2.49                   | 0.0005           | 1.01                    | 0.7572           |
| Acot3  | Acyl-CoA thioesterase 3                                            | -2.10                   | 0.0016           | 1.21                    | 0.3829           |
| Acaa2  | Acetyl-Coenzyme A acyltransferase 2                                | 1.75                    | 0.0046           | -1.06                   | 0.7816           |
| Fabp3  | Fatty acid binding protein 3, muscle and heart                     | 1.56                    | 0.0417           | 1.04                    | 0.8335           |
| Ehhadh | Enoyl-Coenzyme A, hydratase/3-hydroxyacyl Coenzyme A dehydrogenase | -1.93                   | 0.0002           | 1.26                    | 0.2375           |

|         |                                                              |       |        |       |        |
|---------|--------------------------------------------------------------|-------|--------|-------|--------|
| Hmgcl   | 3-hydroxymethyl-3-methylglutaryl-Coenzyme A lyase            | -1.90 | 0.0083 | 1.00  | 0.8511 |
| Slc27a1 | Solute carrier family 27 (fatty acid transporter), member 1  | -1.88 | 0.0029 | -1.03 | 0.8843 |
| Acsm3   | Acyl-CoA synthetase medium-chain family member 3             | -1.81 | 0.0028 | 1.08  | 0.6714 |
| Prkacb  | Protein kinase, cAMP dependent, catalytic, beta              | -1.75 | 0.0025 | 1.19  | 0.3021 |
| Acadsb  | Acyl-Coenzyme A dehydrogenase, short/branched chain          | 1.70  | 0.0046 | 1.01  | 0.9700 |
| Gpd1    | Glycerol-3-phosphate dehydrogenase 1 (soluble)               | -1.67 | 0.0135 | -1.05 | 0.9915 |
| Echs1   | Enoyl Coenzyme A hydratase, short chain, 1, mitochondrial    | -1.64 | 0.0002 | -1.01 | 0.9605 |
| Prkag2  | Protein kinase, AMP-activated, gamma 2 non-catalytic subunit | -1.60 | 0.0075 | 1.08  | 0.6501 |
| Gpd2    | Glycerol-3-phosphate dehydrogenase 2, mitochondrial          | -1.56 | 0.0295 | 1.28  | 0.2591 |
| Mcee    | Methylmalonyl CoA epimerase                                  | -1.56 | 0.0052 | -1.13 | 0.4943 |
| Acsl1   | Acyl-CoA synthetase long-chain family member 1               | -1.48 | 0.0146 | 1.10  | 0.5983 |
| Crot    | Carnitine O-octanoyltransferase                              | -1.48 | 0.0072 | 1.05  | 0.6910 |
| Decr2   | 2,4-dienoyl CoA reductase 2, peroxisomal                     | -1.42 | 0.0374 | 1.04  | 0.8023 |
| Acot9   | Acyl-CoA thioesterase 9                                      | -1.39 | 0.0227 | 1.09  | 0.5192 |
| Prkaca  | Protein kinase, cAMP-dependent, catalytic, alpha             | -1.38 | 0.0068 | 1.11  | 0.3198 |
| Acsl6   | Acyl-CoA synthetase long-chain family member 6               | -1.33 | 0.0459 | 1.10  | 0.4790 |
| Bdh2    | 3-hydroxybutyrate dehydrogenase, type 2                      | -1.32 | 0.0396 | -1.03 | 0.7182 |
| Gcdh    | Glutaryl-Coenzyme A dehydrogenase                            | -1.31 | 0.0052 | -1.08 | 0.3272 |

|        |                                                              |       |        |       |        |
|--------|--------------------------------------------------------------|-------|--------|-------|--------|
| Pecr   | Peroxisomal trans-2-enoyl-CoA reductase                      | -1.28 | 0.0045 | 1.12  | 0.2338 |
| Prkag1 | Protein kinase, AMP-activated, gamma 1 non-catalytic subunit | -1.18 | 0.0179 | -1.03 | 0.5338 |

The upregulation more than 2 is labeled in red and the downregulation less than -2 is labeled in dark green. P<0.05 is labeled in blue.

\*The expression of below 57 fatty acid metabolism-related genes were not significantly changed both in FHR and FHR+Dichloroacetate groups: acetyl-coenzyme A acyltransferase 1A, acyl-coenzyme A dehydrogenase 11, acyl-coenzyme A dehydrogenase 9, long-chain acyl-coenzyme A dehydrogenase, acyl-coenzyme A dehydrogenase (C-4 to C-12 straight chain), acyl-coenzyme A dehydrogenase (very long chain), acetyl-coenzyme A acetyltransferase 1, acetyl-coenzyme A acetyltransferase 3, acyl-CoA thioesterase 12, acyl-CoA thioesterase 2, acyl-CoA thioesterase 7, acyl-CoA thioesterase 8, acyl-coenzyme A oxidase 1, acyl-coenzyme A oxidase 3, acyl-CoA synthetase bubblegum 1, acyl-CoA synthetase bubblegum family member 2, acyl-CoA synthetase long-chain family member 3, acyl-CoA synthetase long-chain family member 4, acyl-CoA synthetase long-chain family member 5, acyl-CoA synthetase medium-chain family member 2, acyl-CoA synthetase medium-chain family member 4, acyl-CoA synthetase medium-chain family member 5, aldehyde dehydrogenase 2 family (mitochondrial), 3-hydroxybutyrate dehydrogenase 1, carnitine palmitoyltransferase 1a, carnitine palmitoyltransferase 1b, carnitine palmitoyltransferase 1c, carnitine palmitoyltransferase 2, carnitine acetyltransferase, 2,4-dienoyl CoA reductase 1(mitochondrial), fatty acid binding protein 2, fatty acid binding protein 4, fatty acid binding protein 5, Fatty acid binding protein 6, Fatty acid binding protein 7, Glycerol kinase, Glycerol kinase 2, hydroxyacyl-Coenzyme A dehydrogenase/3-ketoacyl-Coenzyme A thiolase/enoyl-Coenzyme A hydratase alpha subunit, 3-hydroxy-3-methylglutaryl-Coenzyme A synthase 1, 3-hydroxy-3-methylglutaryl-Coenzyme A synthase 2 (mitochondrial), hormone sensitive lipase, Lipoprotein lipase, methylmalonyl-Coenzyme A mutase, 3-oxoacid CoA transferase 2A, enoyl-Coenzyme A delta isomerase 2, pyrophosphatase (inorganic) 1, AMP-activated Protein kinase alpha 1, AMP-activated Protein kinase alpha 2, AMP-activated Protein kinase beta 1 subunit, AMP-activated Protein kinase beta 2 subunit, AMP-activated Protein kinase gamma 3 subunit, solute carrier family 27 (fatty acid transporter) member 2, 3, 4, 5, 6.

## Supplemental Figures:

Supplemental Fig 1

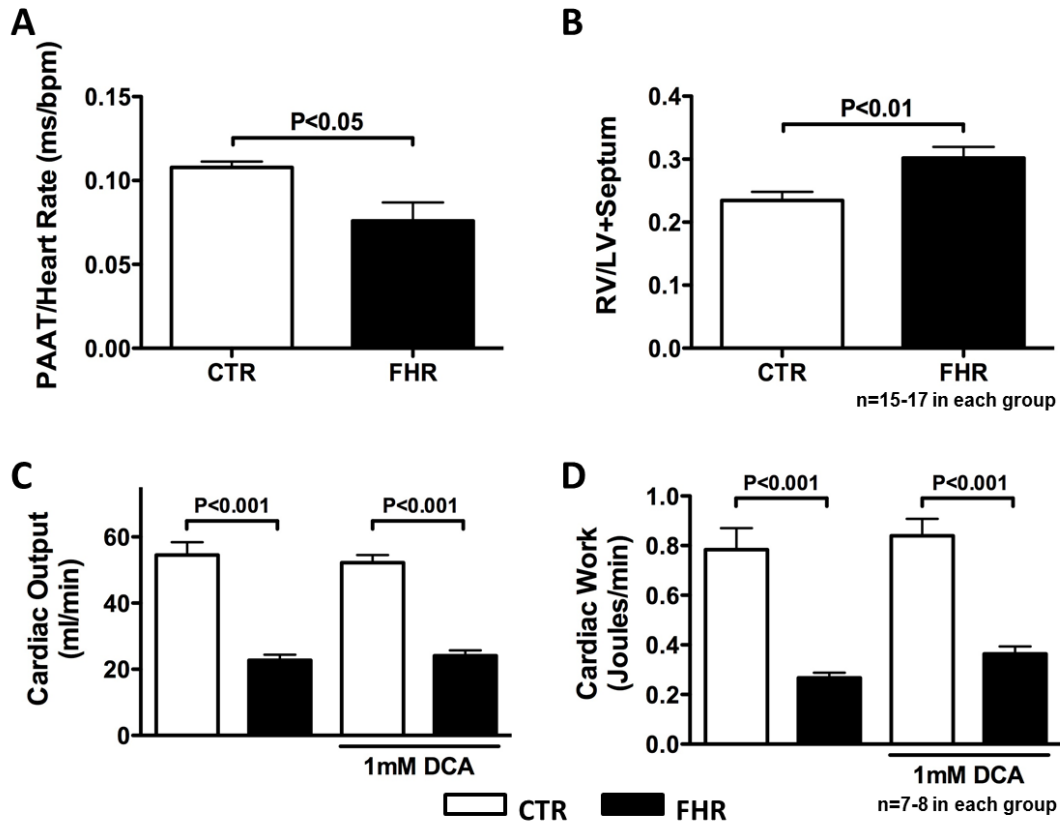

**Supplemental Figure 1: Cardiac function is not changed by acute dichloroacetate in the heart in FHR RVH.** Prior to initiation of therapy FHR had evidence of PAH, including **A.** reduced pulmonary artery acceleration time (PAAT) corrected for heart rate (HR). **B.** RVH (increased RV/LV+septum ratio). Cardiac output (**C**) and cardiac work (**D**) are reduced in FHR heart and dichloroacetate does not change both parameters.



## Supplemental Fig 2

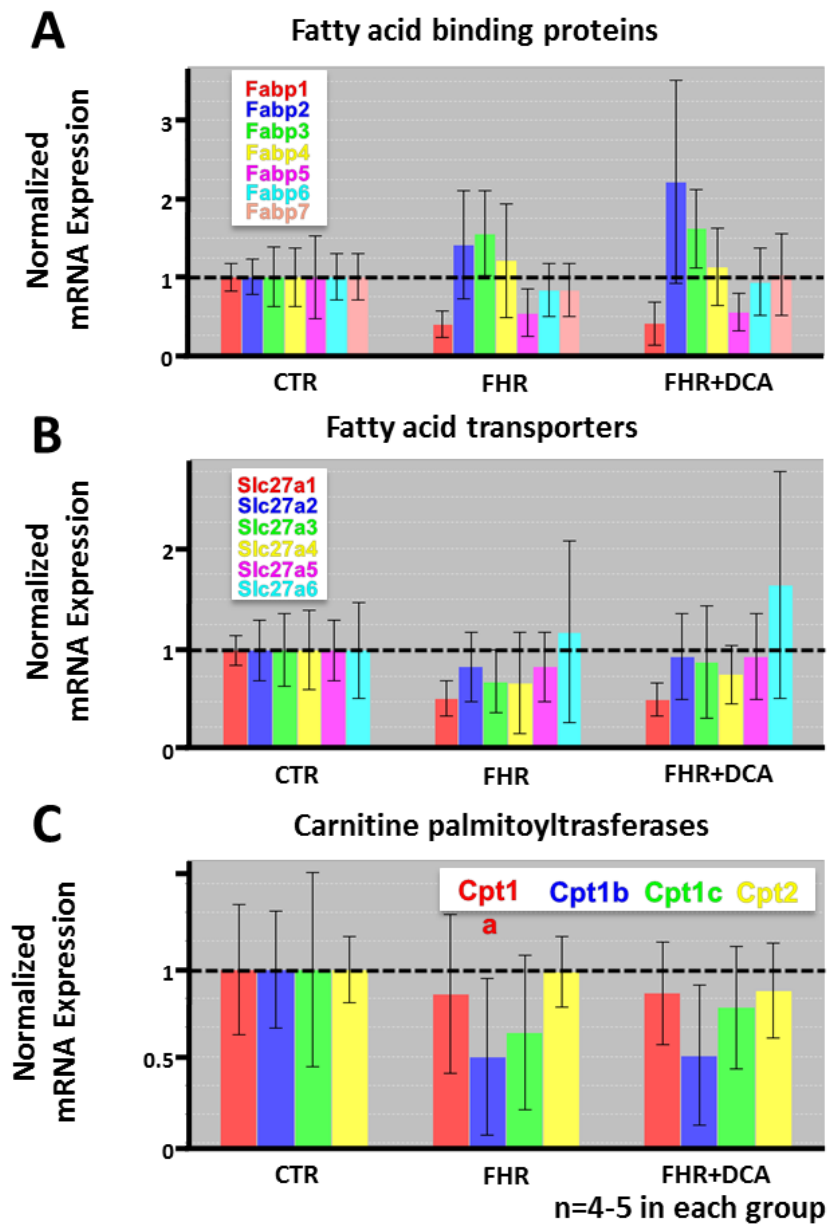

**Supplemental Figure 2: Fatty acid oxidation-related genes remain unchanged in RV in FHR.** Fatty acid binding proteins (A), fatty acid transporters (B) and carnitine palmitoyltrasferases (C) are not changed in RV in FHR and dichloroacetate doesn't alter the expressions.

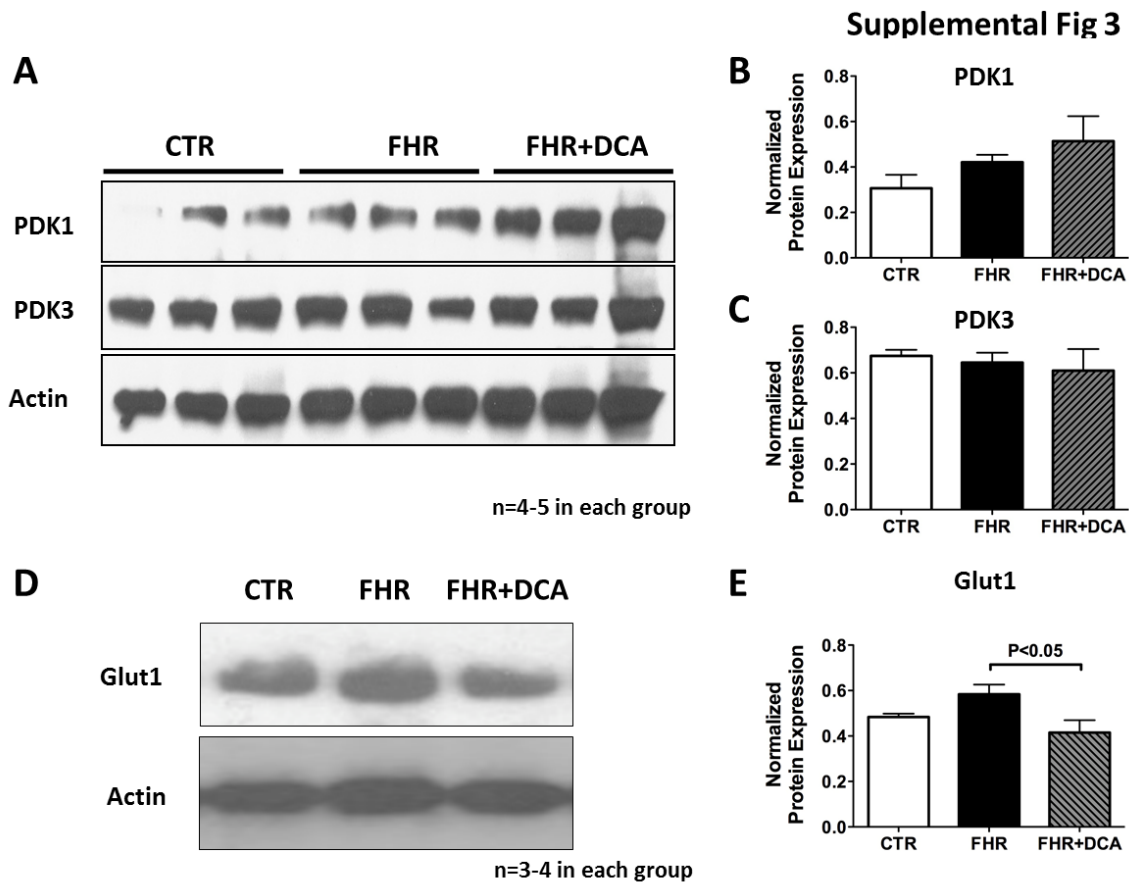

**Supplemental Figure 3: The protein expressions of PDK1, PDK3 and Glut1 in RV in FHR.** **A-C.** Immunoblotting bands and bar graphs showing the protein expression of PDK1 and PDK3 are not changed in RV in FHR and dichloroacetate does not alter the proteins expressions. **D-E.** The protein expressions of Glut1 is increased in RV in FHR and reduced by chronic dichloroacetate treatment.

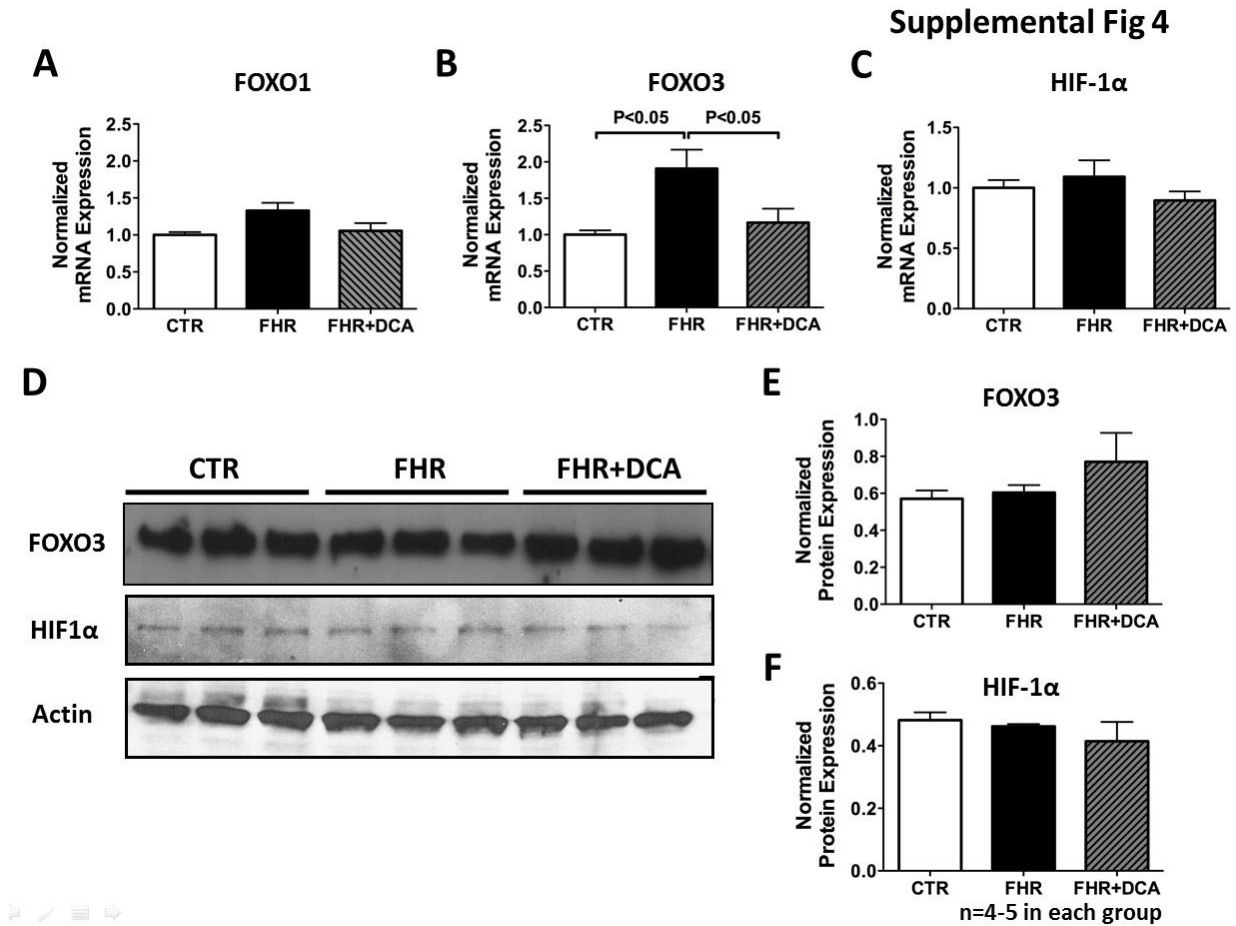

**Supplemental Figure 4: The changes of the transcriptional factors in RV in FHR.** **A.** The mRNA expressions of FOXO1 tend to increase in RV in FHR and dichloroacetate tends to decrease the expressions. **B.** The mRNA expressions of FOXO3 are increased in RV in FHR and dichloroacetate normalizes the increase. **C.** The mRNA expressions of HIF-1 $\alpha$  are not changed in RV in FHR and dichloroacetate does not alter the expressions. **D-F.** The protein expression of FOXO3 and HIF-1 $\alpha$  remain unchanged in RV in FHR and FHR+dichloroacetate.

## References

1. Piao L, Fang YH, Cadete VJ, Wietholt C, Urboniene D, Toth PT, Marsboom G, Zhang HJ, Haber I, Rehman J, Lopaschuk GD, Archer SL (2010) The inhibition of pyruvate dehydrogenase kinase improves impaired cardiac function and electrical remodeling in two models of right ventricular hypertrophy: resuscitating the hibernating right ventricle. *J Mol Med* 88: 47-60.

2. Hardziyenka M, Campian ME, de Bruin-Bon HA, Michel MC, Tan HL (2006) Sequence of echocardiographic changes during development of right ventricular failure in rat. *J Am Soc Echocardiogr* 19: 1272-1279.
3. Urboniene D, Haber I, Fang YH, Thenappan T, Archer SL (2010) Validation of high-resolution echocardiography and magnetic resonance imaging vs. high-fidelity catheterization in experimental pulmonary hypertension. *American journal of physiology Lung cellular and molecular physiology* 299: L401-412.
4. Fang YH, Piao L, Hong Z, Toth PT, Marsboom G, Bache-Wiig P, Rehman J, Archer SL (2012) Therapeutic inhibition of fatty acid oxidation in right ventricular hypertrophy: exploiting Randle's cycle. *J Mol Med (Berl)* 90: 31-43.
